# Supplementary material for: Bioactive Constituents of Lamium album L. as Inhibitors of Cytokine Secretion in Human Neutrophils
Source: PubMed Central journal article supplement (PMC6278331; doi:10.3390/molecules23112770), 2018-10-25
Supplement: molecules-23-02770-s001.pdf [file molecules-23-02770-s001.pdf]

*Supplementary Materials*

# **Bioactive constituents of *Lamium album* L. as inhibitors of cytokines secretion in human neutrophils**

**Monika E. Czerwińska<sup>1,\*</sup>, Anita Świerczewska<sup>1</sup>, Sebastian Granica<sup>1</sup>**

<sup>1</sup> Department of Pharmacognosy and Molecular Basis of Phytotherapy, Medical University of Warsaw, 1 Banacha street, 02-097 Warsaw, Poland

\* Correspondence: [mczerwinska@wum.edu.pl](mailto:mczerwinska@wum.edu.pl); Tel.: +48-22-572-0953

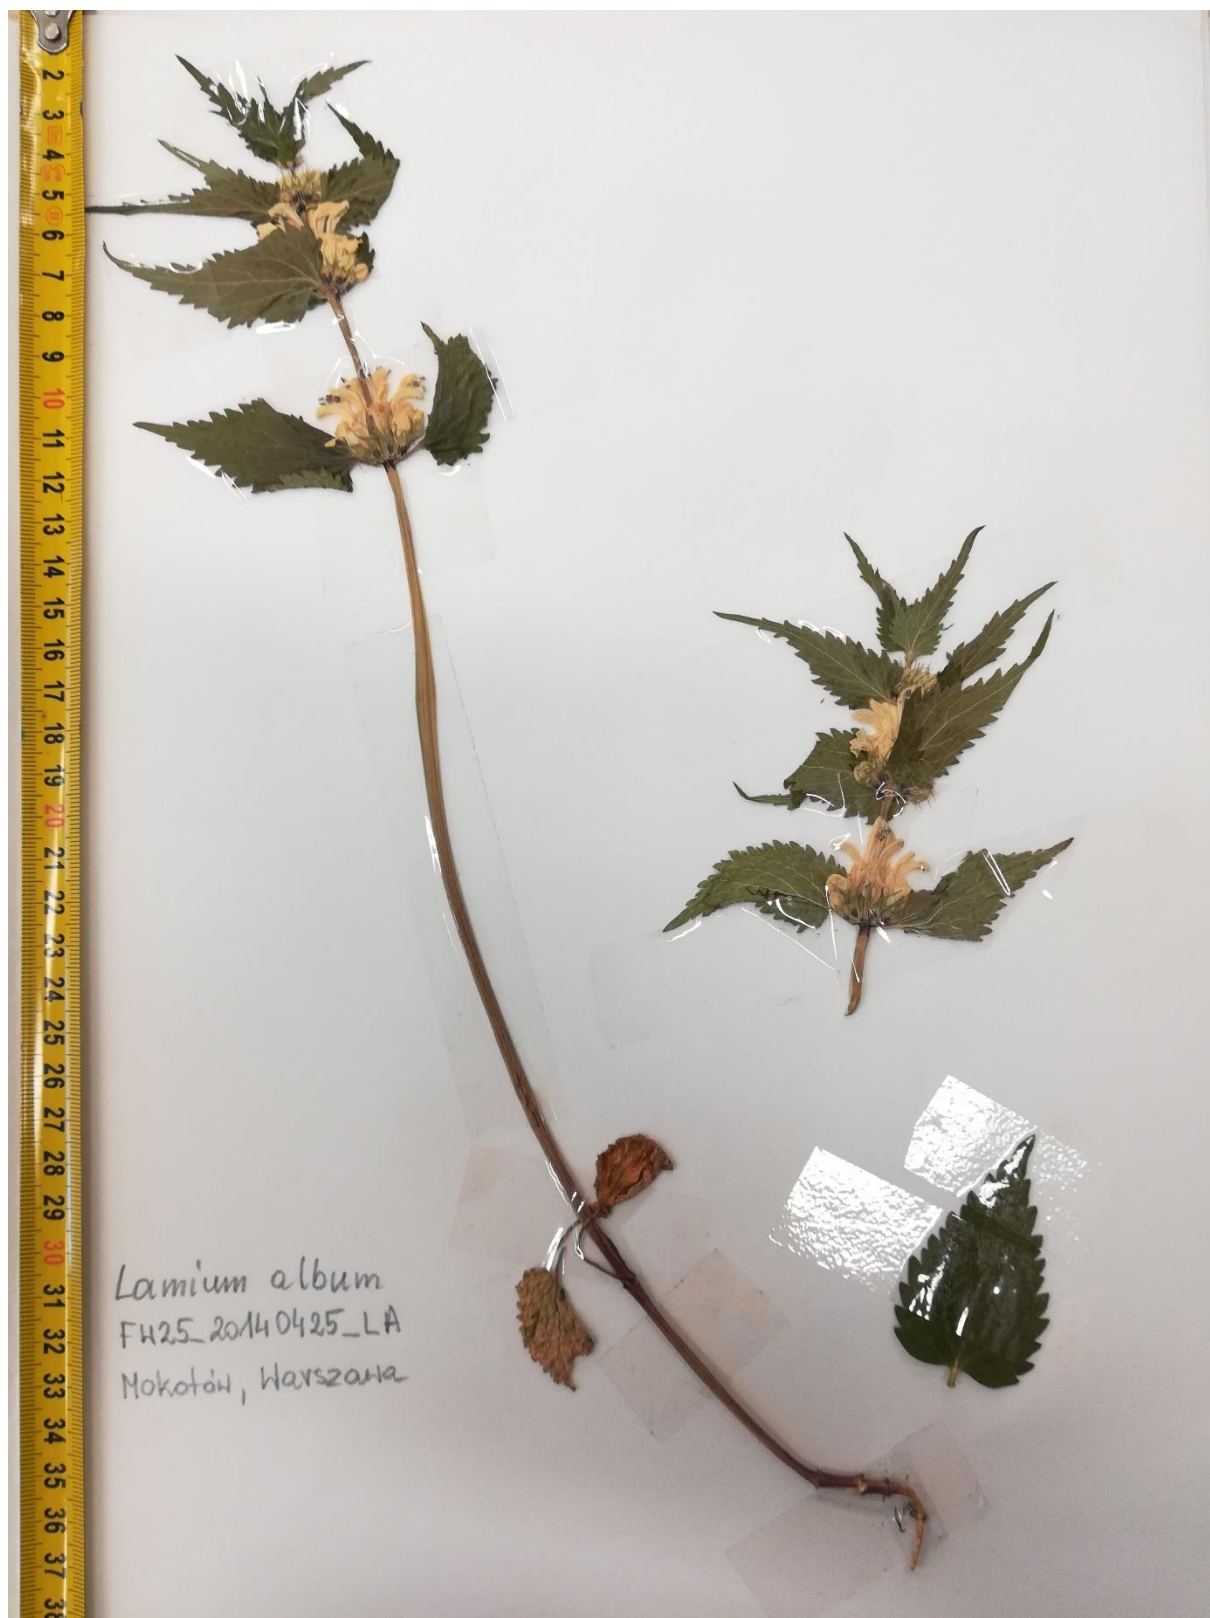

Figure S1. The voucher specimen of collected herb of *L. album* used for the isolation of compounds.

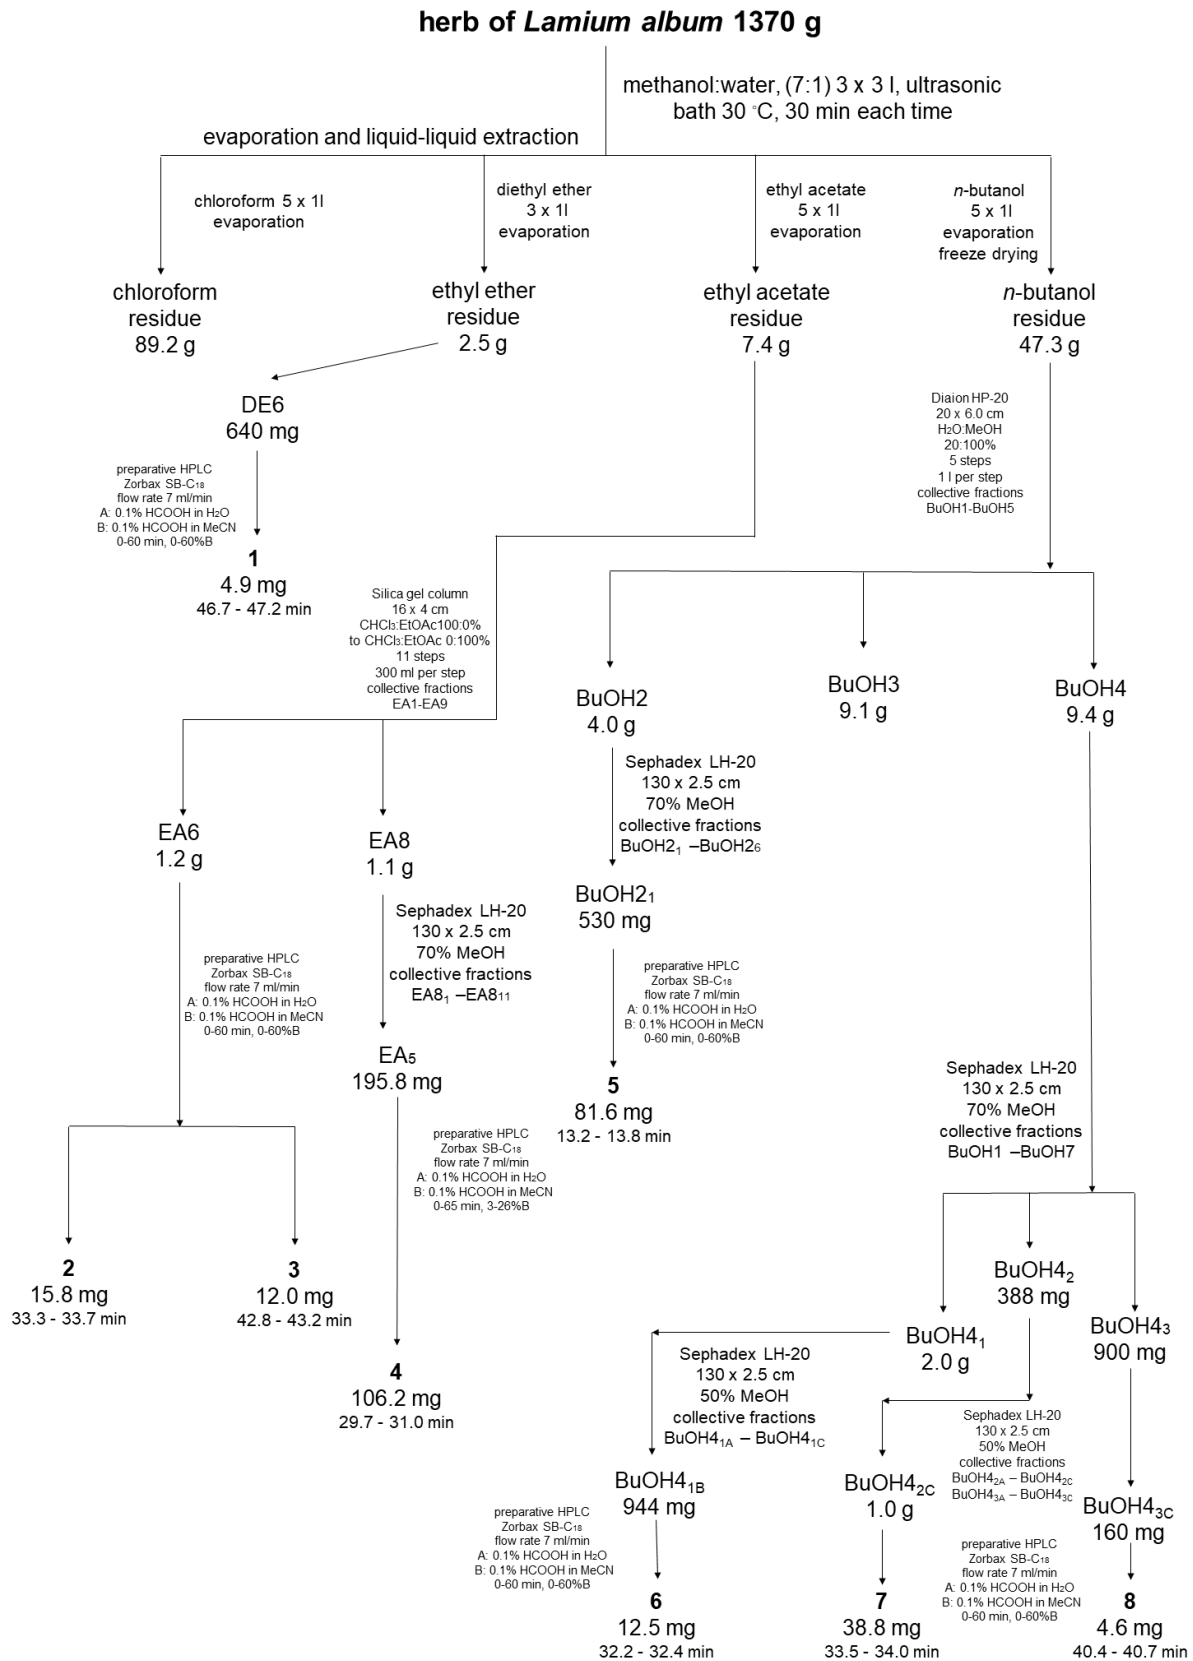

**Figure S2.** The draft of isolation of compounds from aqueous-methanolic extract from herb of *L. album*.

## Compound 1

### Apigenin 7-*O*- $\beta$ -D-(6''-*trans-p*-coumaroyl)-glucoside

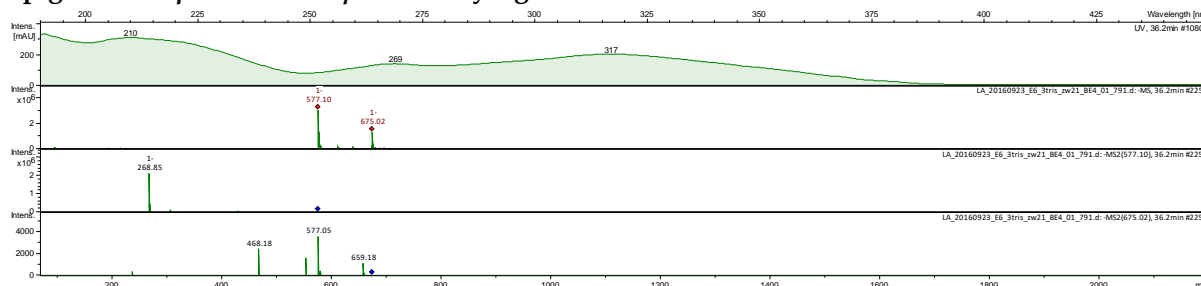

<sup>1</sup>H NMR (300 MHz, DMSO)  $\delta$  12.97 (1H, s, 5-OH), 7.94 (2H, d,  $J$  = 8.8 Hz, H-2', H-6'), 7.51 (1H, s, , H- $\beta$ ), 7.36 (1H, d,  $J$  = 8.6 Hz, H-2''', H-6'''), 6.92 (2H, d,  $J$  = 8.7 Hz, H-3', H-5'), 6.82 (2H, d,  $J$  = 6.9 Hz, H-1, H-8), 6.67 (2H, d,  $J$  = 8.6 Hz, H-3''', H-5'''), 6.47 (1H, s, H-6), 6.30 (1H, s, H- $\alpha$ ), 5.16 (1H, d,  $J$  = 7.0 Hz, H-1'), 4.46 (1H, d,  $J$  = 10.9 Hz, H-6'' $\alpha$ ), 4.21 – 4.09 (1H, m, H-6'' $\beta$ ), 3.83 (1H, s, H-5'').

Compound 1 was identified by comparing the above spectral data with those in the literature [1, 2].

## Compound 2

### Astragalin

### Kaempferol 3-*O*- $\beta$ -glucopyranoside

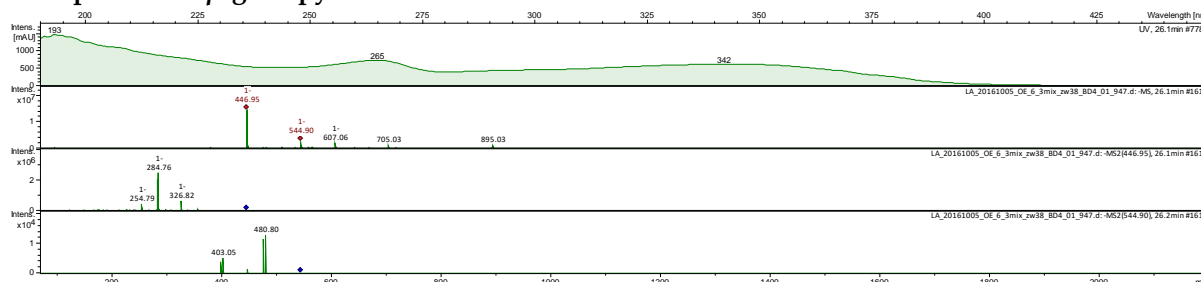

<sup>1</sup>H NMR (300 MHz, CD<sub>3</sub>OD)  $\delta$ : 6.16 (1H, d,  $J$  = 1.8 Hz, H-6), 6.34 (1H, d,  $J$  = 1.8 Hz, H-8), 8.05 (2H, d,  $J$  = 8.3 Hz, H-2', 6'), 6.86 (2H, d,  $J$  = 8.3 Hz, H-3', 5'), 5.25 (1H, d,  $J$  = 6.1 Hz, H-1'), 3.73-3.20 (m).

Compound 3 was identified by comparing the above spectral data with those in the literature [3].

## Compound 3

### Quercetin 3-*O*-(4'''-*O*-*E*-feruloyl)- $\alpha$ -rhamnopyranosyl-(1 $\rightarrow$ 6)- $\beta$ -glucopyranoside

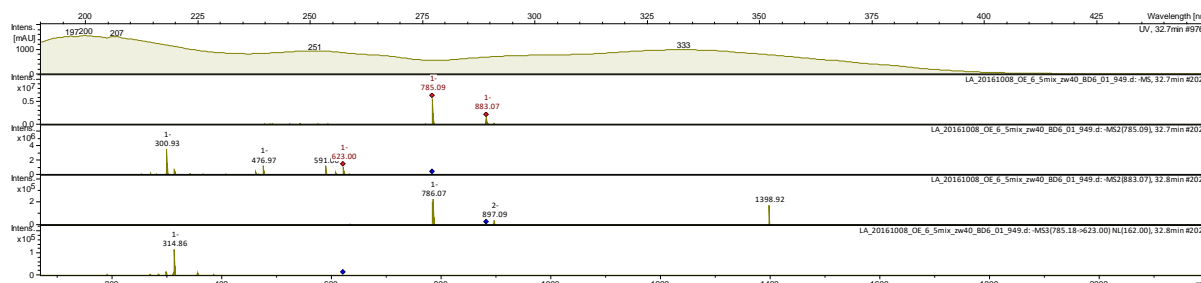

## Compound 4

### Verbascoside

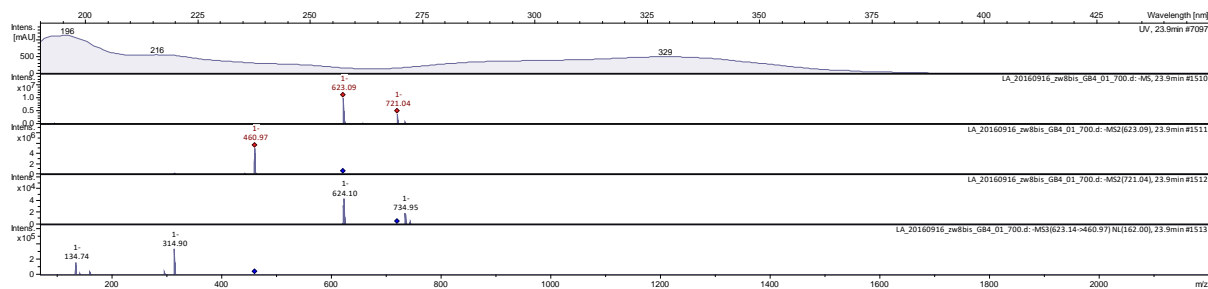

$^1\text{H}$  NMR (300 MHz,  $\text{CD}_3\text{OD}$ )  $\delta$  7.59 (1H, d,  $J$  = 15.9 Hz, H- $\beta$ ), 7.05 (1H, d,  $J$  = 1.8 Hz, H-2), 6.96 (1H, dd,  $J$  = 8.3, 1.8 Hz, H-6), 6.78 (1H, d,  $J$  = 8.2 Hz, H-5), 6.70 (1H, d,  $J$  = 2.4 Hz, H-2'), 6.66 (1H, s, H-5'), 6.57 (1H, dd,  $J$  = 8.1, 1.9 Hz, H-6'), 6.27 (1H, d,  $J$  = 15.9 Hz, H- $\alpha$ ), 5.19 (1H, s, H-1'''), 4.92 (1H, t,  $J$  = 9.4 Hz, H-4''), 4.38 (1H, d,  $J$  = 7.9 Hz, H-1''), 4.05 (1H, dd,  $J$  = 16.9, 7.4 Hz, H-8' $\alpha$ ), 3.92 (1H, s, H-2'''), 3.83 (1H, d,  $J$  = 9.2 Hz, H-3''), 3.75 (1H, dd,  $J$  = 15.5, 7.8 Hz, H-8' $\beta$ ), 3.61 (1H, dd,  $J$  = 10.5, 6.3 Hz, H-6'' $\alpha$ ), 3.56 (2H, m, overlapped H-6'' $\beta$ , H-3'''), 3.52 (1H, s, H-5'''), 3.39 (1H, t, H-2''), 3.27 (1H, t, H-4'''), 2.80 (t,  $J$  = 7.4 Hz, H-7'), 1.09 (3H, d,  $J$  = 6.2 Hz, H-6'''). Compound 4 was identified by comparing the above spectral data with those in the literature [4].

### Compound 5 Lamalbid (lamiridoside)

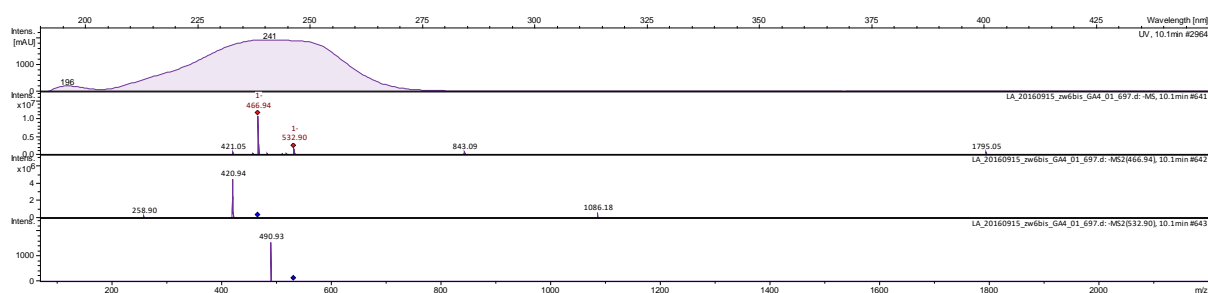

$^1\text{H}$  NMR (300 MHz,  $\text{CD}_3\text{OD}$ )  $\delta$  7.40 (1H, s, H-3), 5.62 (1H, d,  $J$  = 1.7 Hz, H-1), 4.61 (1H, d,  $J$  = 7.9 Hz, H-1'), 3.95 (1H, t,  $J$  = 3.9 Hz, H-6), 3.89 (1H, dd,  $J$  = 11.9, 1.7 Hz,  $\text{CH}_2$ -6'), 3.73 (3H, s,  $\text{OCH}_3$ ), 3.65 (1H, dd,  $J$  = 11.9, 5.7 Hz,  $\text{CH}_2$ -6'), 3.54 (1H, d,  $J$  = 4.4 Hz, H-7), 3.36 (1H, t,  $J$  = 6.9 Hz, H-3'), 3.30 (1H, m, H-5'), 3.24 (1H, d,  $J$  = 9.3 Hz, H-4'), 2.93 (1H, dd,  $J$  = 10.7, 2.6 Hz, H-5), 2.80 (1H, d,  $J$  = 12.0 Hz, H-9), 1.20 (3H, s,  $\text{CH}_3$ -10). Compound 5 was identified by comparing the above spectral data with those in the literature [5].

### Compound 6 Shanzhiside methyl ester

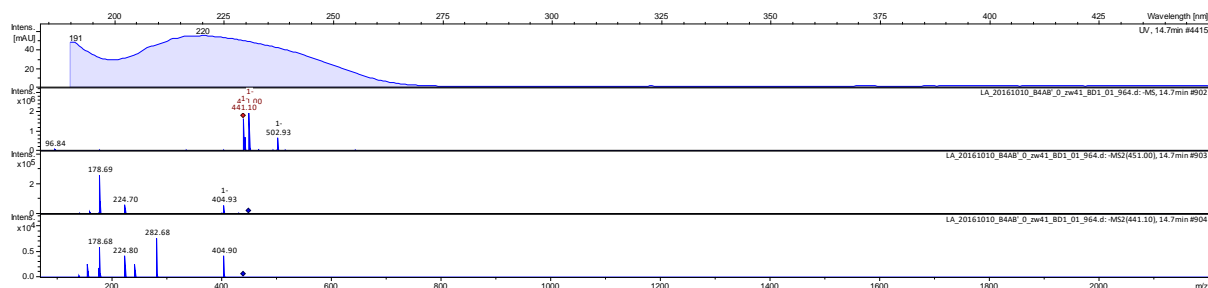

$^1\text{H}$  NMR (300 MHz,  $\text{CD}_3\text{OD}$ )  $\delta$ : 7.41 (1H, s, H-3), 5.61 (1H, d,  $J$  = 1.6 Hz, H-1 $\alpha$ ), 4.85 (1H, d,  $J$  = 8.0 Hz, H-1'), 3.74 (3H, s,  $\text{OCH}_3$ ), 3.00 (1H, m, H-5 $\beta$ ), 2.62 (1H, m, H-9 $\beta$ ), 1.90 (2H, m, H-7), 1.25 (3H, s,  $\text{CH}_3$ -10). Compound 6 was identified by comparing the above spectral data with those in the literature [6].

## Compound 7 Phlinoside D

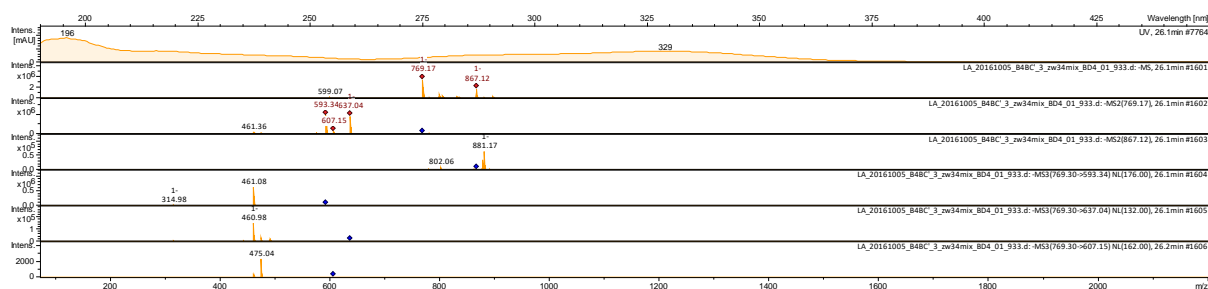

$^1\text{H}$  NMR (300 MHz,  $\text{CD}_3\text{OD}$ )  $\delta$  7.66 (1H, d,  $J = 15.8$  Hz, H- $\alpha$ ), 7.20 (1H, s, H-2), 7.09 (1H, d,  $J = 8.2$  Hz, H-6), 6.82 (1H, d,  $J = 8.2$  Hz, H-5), 6.70 (1H, d,  $J = 1.9$  Hz, H-5'), 6.68 (1H, d,  $J = 8.1$  Hz, H-2'), 6.57 (1H, d,  $J = 8.1$  Hz, H-6'), 6.38 (1H, d,  $J = 15.8$  Hz, H- $\beta$ ), 5.49 (1H, s, H-1'''), 4.94 (1H, d,  $J = 8.8$  Hz, H-4''), 4.38 (1H, d,  $J = 7.8$  Hz, H-1''), 4.32 (1H, d,  $J = 7.1$  Hz, H-1'''), 4.06 (1H, dd,  $J = 16.9, 7.5$  Hz, H-8'), 3.95 (1H, s, H-2'''), 3.89 (3H, s, - $\text{OCH}_3$ , H-2'', H-6'' $\beta$ ), 3.78 (1H, t, H-3''), 3.56 (2H, d,  $J = 6.4$  Hz, H-6'' $\alpha$ , H-5'''), 3.52 (1H, s, H-5'''), 3.39 (1H, m, H-2''), 3.27 (1H, d,  $J = 9.6$  Hz, H-4'''), 2.80 (2H, t,  $J = 7.3$  Hz, H-7'), 1.10 (3H, dd,  $J = 17.7, 6.1$  Hz, H-6''').

$^{13}\text{C}$  NMR (75 MHz,  $\text{CD}_3\text{OD}$ )  $\delta$  168.22 (C- $\gamma$ ), 150.80 (C-4), 149.38 (C-3), 147.86 (C- $\beta$ ), 146.13 (C-3'), 144.67 (C-4'), 131.47 (C-1'), 127.65 (C-1), 124.34 (C-6), 121.25 (C-6'), 117.11 (C-5'), 116.49 (C-5), 116.28 (C-2'), 115.09 (C- $\alpha$ ), 111.77 (C-2), 107.48 (C-1'''), 104.21 (C-1''), 101.96 (C-1'''), 82.82 (C-2'''), 82.27 (C-3'''), 76.03 (C-2''), 74.37 (C-5''), 74.20 (C-4'''), 72.82 (C-2'''), 72.26 (C-8'), 71.94 (C-3'''), 70.53 (C-4''), 70.34 (C-5'''), 69.84 (C-4'''), 67.32 (C-5'''), 62.34 (C-6''), 56.45 (- $\text{OCH}_3$ /C-3), 36.58 (C-7'), 18.41 (C-6'''). Compound 7 was identified by comparing the above spectral data with those in the literature [7-9].

## Compound 8 Quercetin 3- $O$ - $\alpha$ -rhamnopyranosyl-(1 $\rightarrow$ 2)[(4'''- $O$ - $E$ -feruloyl)- $\alpha$ -rhamnopyranosyl-(1 $\rightarrow$ 6)]- $\beta$ -glucopyranoside

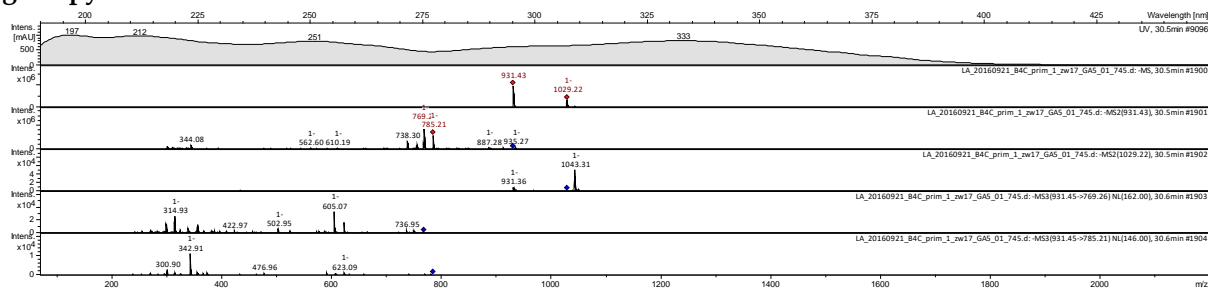

A

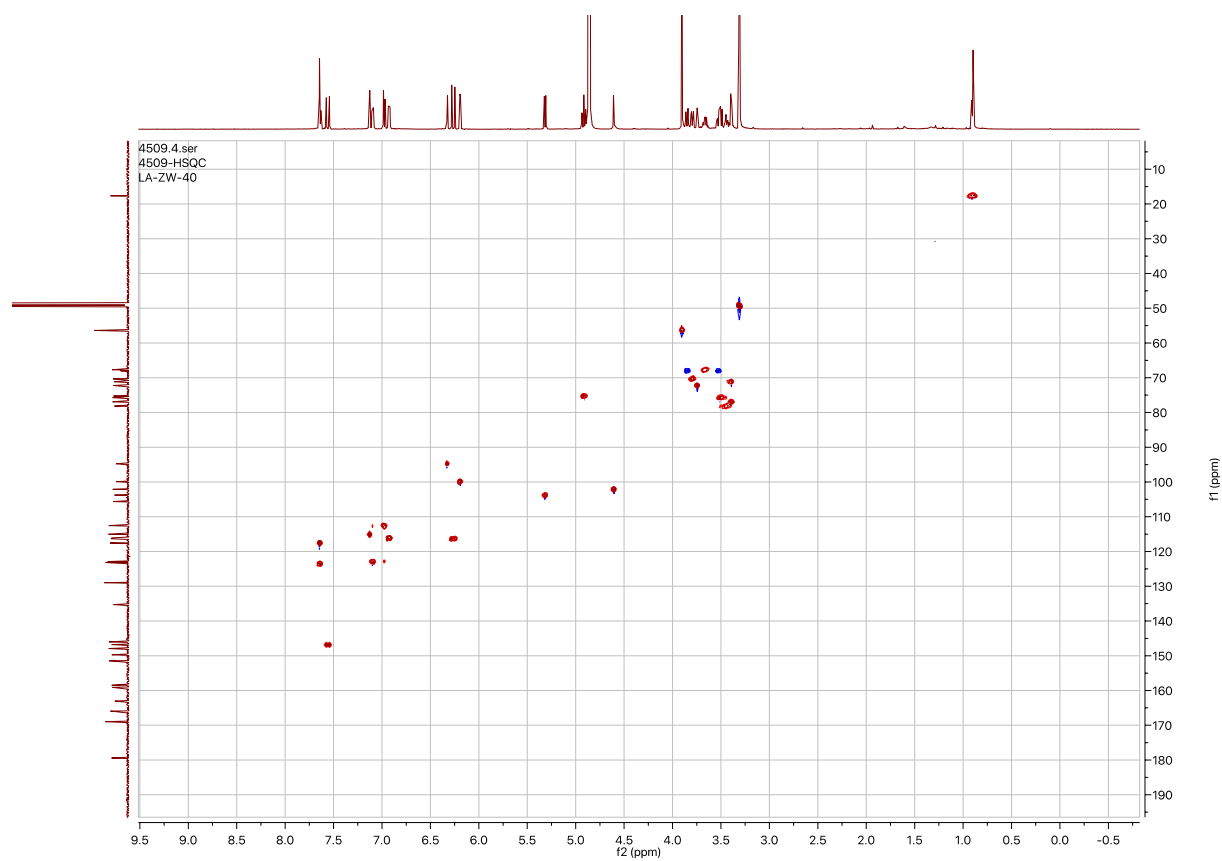

B

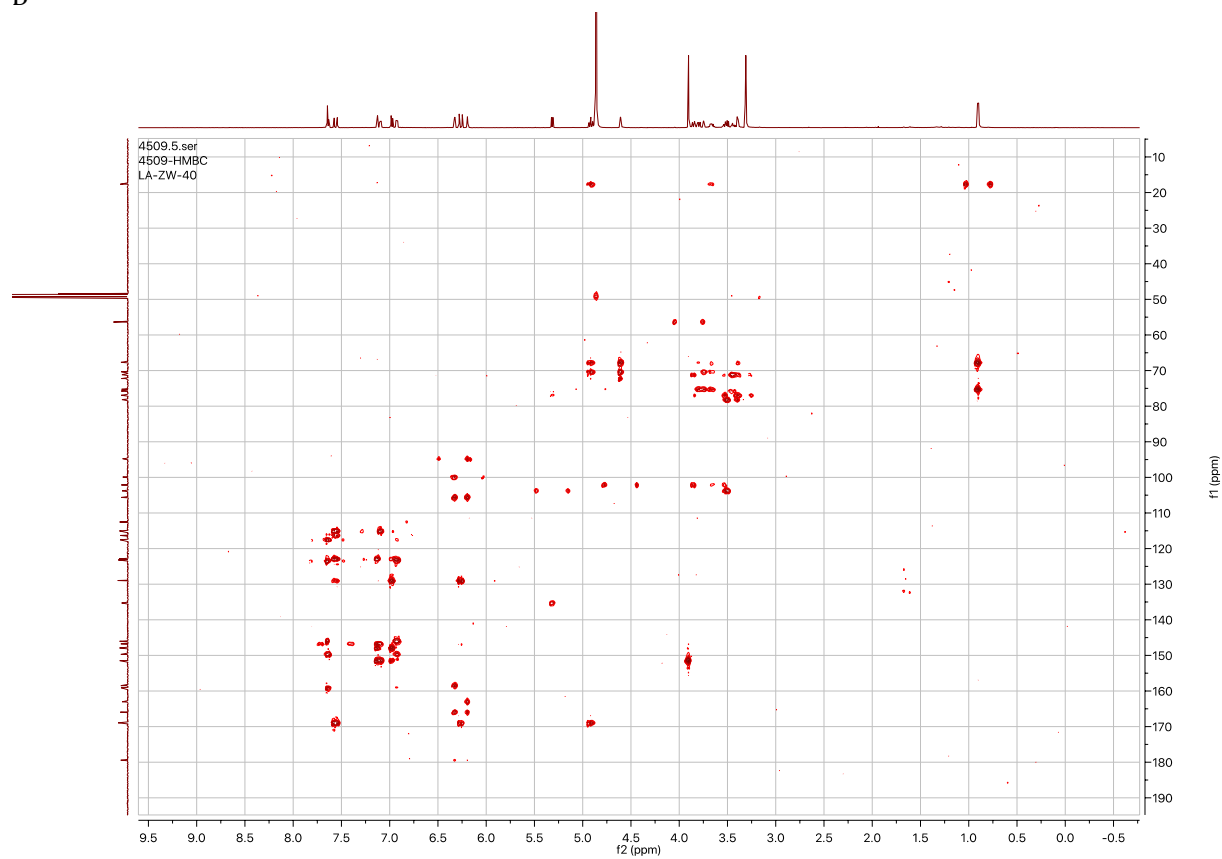

Figure S3. The HSQC (A) and HMBC (B) spectra of compound 3.

A

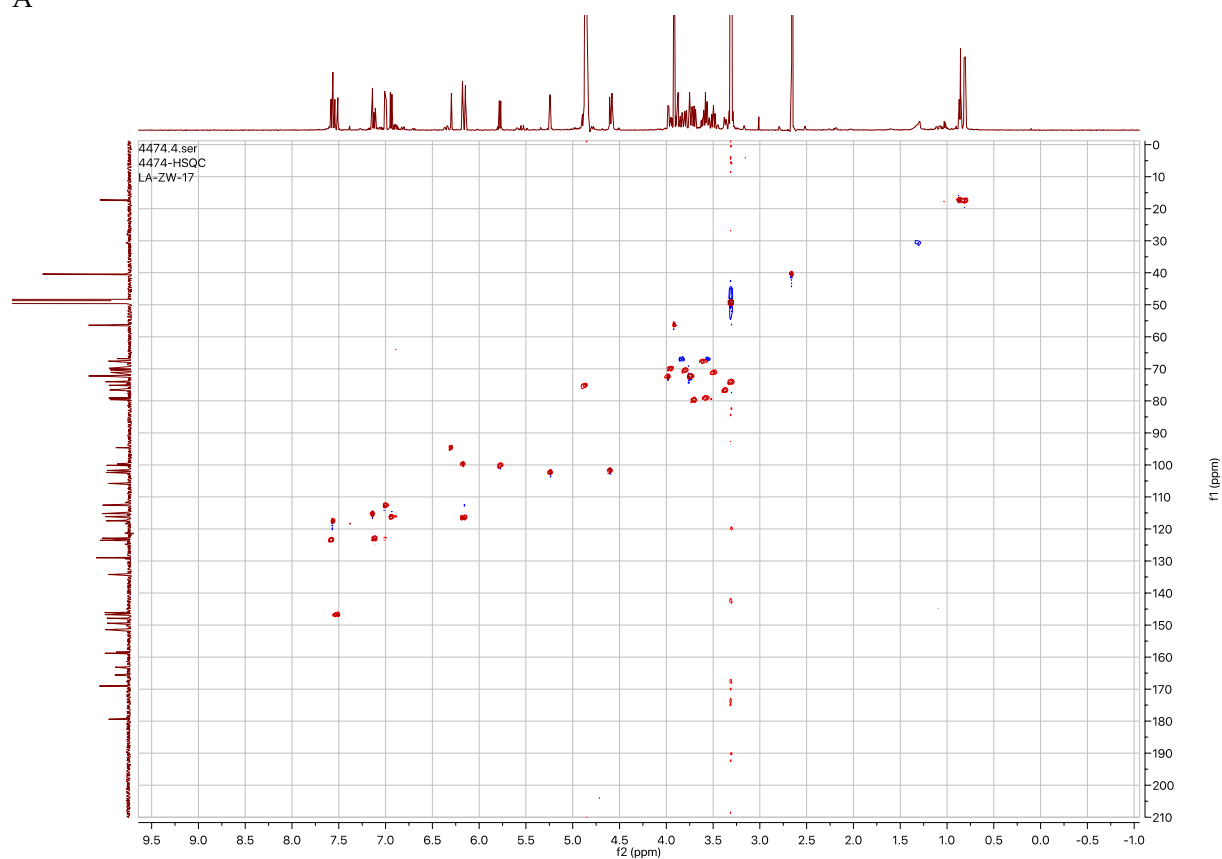

B

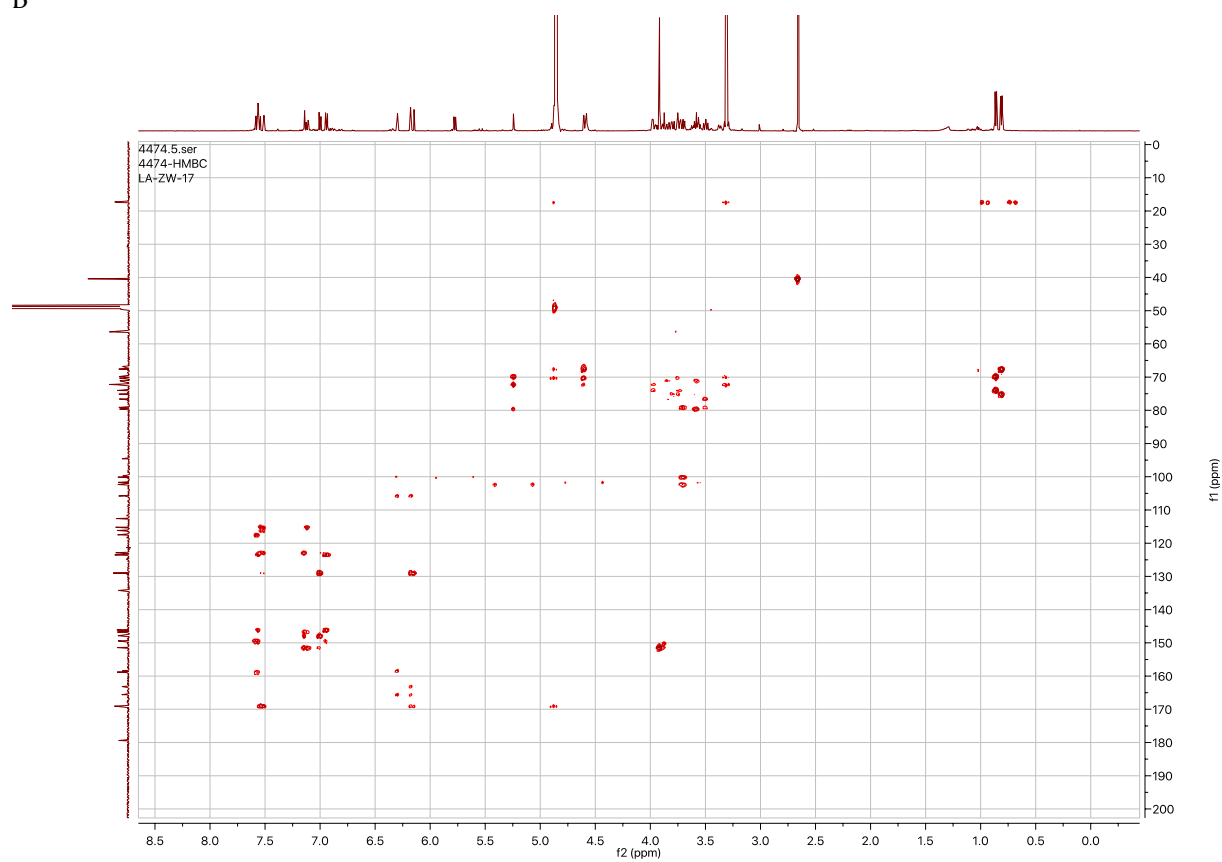

Figure S4. The HSQC (A) and HMBC (B) spectra of compound 8.



## References

1. Amer, M.; Abou-Shoer, M.; Abdel-Kader, M.; El-Shaibany, A.; Abdel-Salam, N., Alakloids and flavone acyl glycosides from *Acanthus arboreus*. *J Braz Chem Soc* **2004**, *15*, 262-266.
2. Itokawa, H.; Suto, K.; Takeya, K., Studies on a novel p-coumaroyl glucoside of apigenin and on other flavonoids isolated from patchouli (Labiatae). *Chem Pharmaceut Bull* **1981**, *29*, 254-256.
3. Ferreira, F. P.; de Oliveira, D. C. R., New constituents from *Mikania laevigata* Shultz Bip. ex Baker. *Tetrahedron Letters* **2010**, *51*, 6856-6859, 10.1016/j.tetlet.2010.10.102.
4. Budzianowski, J.; Skrzypczak, L., Phenylpropanoid esters from *Lamium album* flowers. *Phytochemistry* **1995**, *38*, 997-1001, DOI: 10.1016/0031-9422(94)00727-B.
5. Zhang, H.; Rothwangl, K.; Mesecar, A. D.; Sabahi, A.; Rong, L.; Fong, H. H. S., Lamiridosins, hepatitis C virus entry inhibitors from *Lamium album*. *J Nat Prod* **2009**, *72*, 2158-2162, DOI: 10.1021/np900549e.
6. Kobayashi, S.; Mima, A.; Kihara, M.; Imakura, Y., Iridoid Glucosides from *Lamium amplexicaule*. *Chemical & Pharmaceutical Bulletin* **1986**, *34*, 876-880. <Go to ISI>://WOS:A1986A500600060
7. Calis, I.; Basaran, A. A.; Saracoglu, I.; Sticher, O.; Ruedi, P., Phlinosides A, B and C, three phenylpropanoid glycosides from *Phlomis linearis*. *Phytochemistry* **1990**, *29*, 1253-7, DOI: 10.1016/0031-9422(90)85436-J.
8. Yalçın, N. F.; Ersöz, T.; Bedir, E.; Şahpaz, S.; Bailleul, F.; Khan, I. A.; Dönmez, A. A.; Çalis, I., Phlinoside F, a new phenylethanoid glycoside from *Phlomis angustissima*. *Turk J Chem* **2005**, *29*, 417-423. [www.researchgate.net/publication/297931384 Phlinoside F a new phenylethanoid glycoside from Ph lomis angustissima](http://www.researchgate.net/publication/297931384_Phlinoside_F_a_new_phenylethanoid_glycoside_from_Ph_lomis_angustissima) (accessed on 16 September 2014)
9. Calis, I.; Basaran, A. A.; Saracoglu, I.; Sticher, O.; Ruedi, P., Phlinosides D and E, phenylpropanoid glycosides, and iridoids from *Phlomis linearis*. *Phytochemistry* **1991**, *30*, 3073-5, DOI: 10.1016/S0031-9422(00)98255-4.
